# Supplementary material for: Supramolecular assemblies of germanium(ii) halides with O-, S- and Se-donor macrocycles – the effects of donor atom type upon structure
Source: Royal Society of Chemistry journal article supplement (doi:10.1039/c0dt00749h), 2010-11-30
Supplement: c0dt00749h.pdf [file c0dt00749h.pdf]

**Electronic supplementary information**

**Supramolecular assemblies of germanium(II) halides with O-, S- and Se-donor  
macrocycles – the effects of donor atom type upon structure**

Andrew L. Hector, William Levason, Gillian Reid, Michael Webster, and Wenjian Zhang

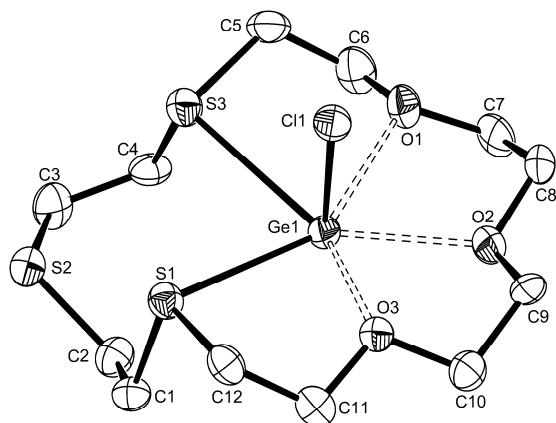

Figure S1. View of the structure of the cation in  $[\text{GeCl}([18]\text{aneS}_3\text{O}_3)]^+$  with the numbering scheme adopted. Ellipsoids are drawn at the 50% probability level.

Selected bond lengths (Å): Ge1–Cl1 = 2.278(3),  
Ge1–O2 = 2.390(7), Ge1–O3 = 2.416(7), Ge1–O1 =  
2.567(8), Ge1–S1 = 2.828(3), Ge1–S3 = 3.007(3).

Table S1: Crystal structure data for [GeCl([18]aneS<sub>3</sub>O<sub>3</sub>)]- [CF<sub>3</sub>SO<sub>3</sub>]<sup>[a]</sup>

| Compound                                                                               | [GeCl([18]aneS <sub>3</sub> O <sub>3</sub> )] [CF <sub>3</sub> SO <sub>3</sub> ] |
|----------------------------------------------------------------------------------------|----------------------------------------------------------------------------------|
| Formula                                                                                | C <sub>13</sub> H <sub>24</sub> ClF <sub>3</sub> GeO <sub>6</sub> S <sub>4</sub> |
| <i>M</i>                                                                               | 569.60                                                                           |
| Crystal system                                                                         | monoclinic                                                                       |
| Space group                                                                            | P2 <sub>1</sub> /c (no. 14)                                                      |
| <i>a</i> /Å                                                                            | 14.504(4)                                                                        |
| <i>b</i> /Å                                                                            | 11.482(4)                                                                        |
| <i>c</i> /Å                                                                            | 14.671(5)                                                                        |
| $\alpha$ /°                                                                            | 90                                                                               |
| $\beta$ /°                                                                             | 115.585(15)                                                                      |
| $\gamma$ /°                                                                            | 90                                                                               |
| <i>U</i> /Å <sup>3</sup>                                                               | 2203.7(12)                                                                       |
| <i>Z</i>                                                                               | 4                                                                                |
| $\mu$ (Mo-K $\alpha$ ) /mm <sup>-1</sup>                                               | 1.942                                                                            |
| Total no. reflections                                                                  | 22647                                                                            |
| Unique reflections                                                                     | 4312                                                                             |
| <i>R</i> <sub>int</sub>                                                                | 0.215                                                                            |
| No. of parameters, restraints                                                          | 253, 0                                                                           |
| <i>R</i> <sub>1</sub> [ <i>I</i> <sub>o</sub> > 2 $\sigma$ ( <i>I</i> <sub>o</sub> )]  | 0.109                                                                            |
| <i>R</i> <sub>1</sub> (all data)                                                       | 0.211                                                                            |
| <i>wR</i> <sub>2</sub> [ <i>I</i> <sub>o</sub> > 2 $\sigma$ ( <i>I</i> <sub>o</sub> )] | 0.163                                                                            |
| <i>wR</i> <sub>2</sub> (all data)                                                      | 0.199                                                                            |

[a] Common items: temperature = 120 K; wavelength (Mo-K $\alpha$ ) = 0.71073 Å;  $\theta$ (max) = 27.5°;  $R_1 = \sum ||F_o| - |F_c|| / \sum |F_o|$ ;  $wR_2 = [\sum w(F_o^2 - F_c^2)^2 / \sum wF_o^4]^{1/2}$ .
